# Supplementary material
Source: PubMed Central journal article supplement (PMC5661273)
Supplement: ASN.2016060690SupplementaryData.pdf [file ASN.2016060690SupplementaryData.pdf]

A

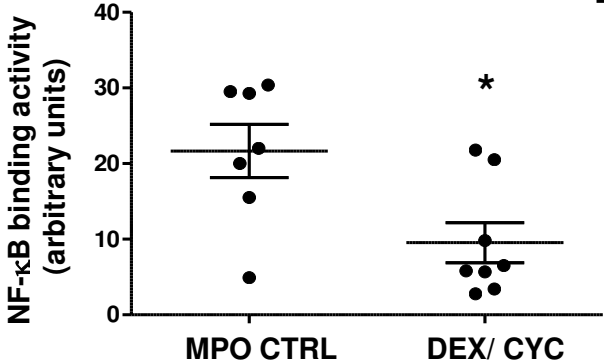

B

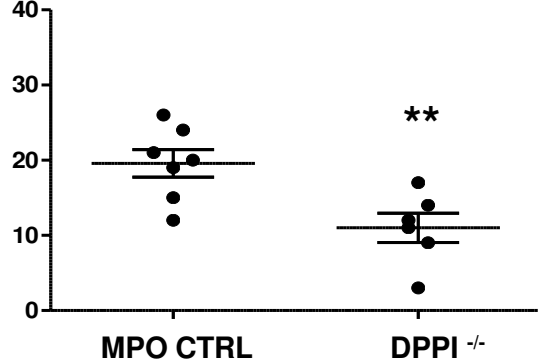

C

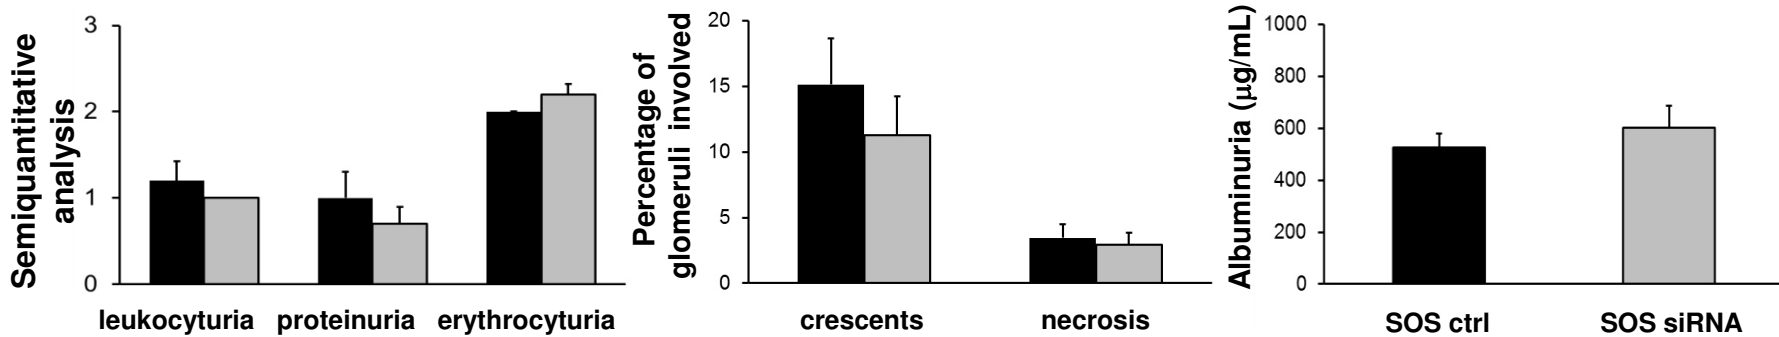

D

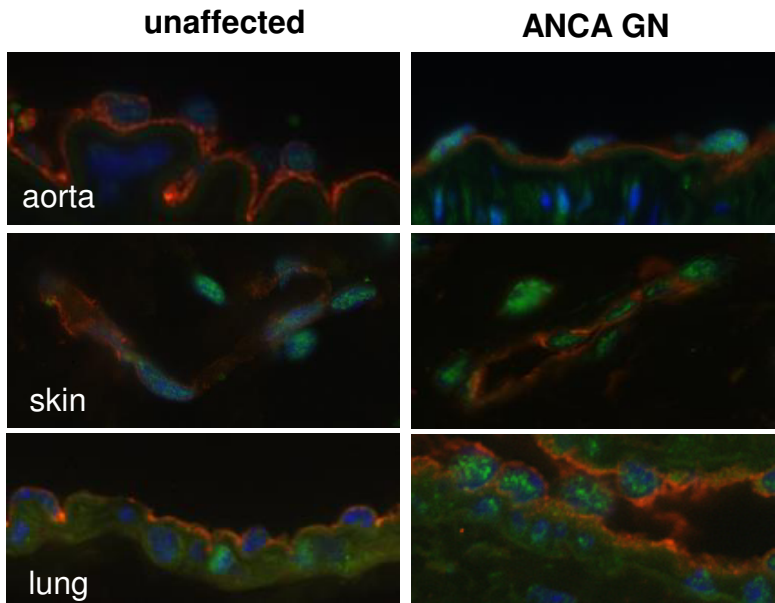

E

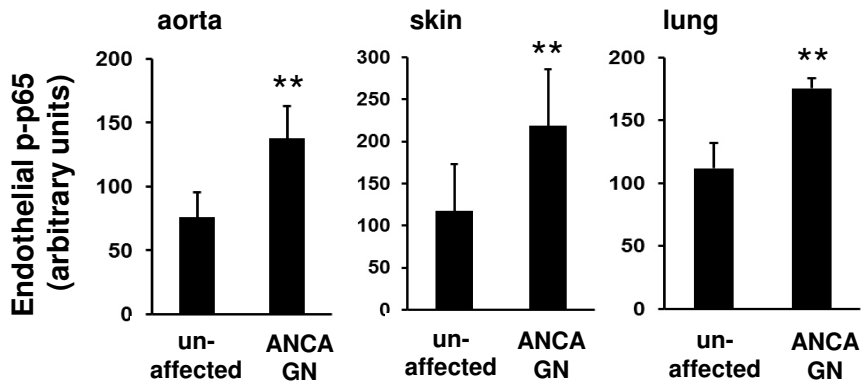

**Supplementary Figure 1.** (A and B) NF- $\kappa$ B activity is diminished in renal tissue from mice with anti-MPO antibody-mediated NCGN that were either left untreated (CTRL, n=7) or treated with (A) dexamethasone/cyclophosphamide (DEX/CYC, n=8)<sup>27</sup>, or were (B) deficient in myeloid dipeptidyl peptidase 1 (DPPI<sup>-/-</sup>, n=6)<sup>28</sup>, respectively. Optical density of the p50/p65 heterodimer was assessed in nuclear extracts prepared from renal tissue, subjected to EMSA, and expressed as arbitrary units. (C) Application of SOS p65 siRNA without prior TNF $\alpha$  and after anti-MPO antibody and LPS administration did not provide protection from NCGN. Semiquantitative dipstick urine analysis, albumin ELISA, and histology with necrosis and crescents quantification from anti-MPO antibody-treated mice that received SOS control liposomes (black bars, n=5) or SOS p65 siRNA is provided (gray bars, n=5). (D, E) Endothelial NF- $\kappa$ B is activated in vascular beds of aorta, skin, and lung in mice with anti-MPO antibody-induced NCGN from our current study. Co-staining using fluorescence-labeled antibodies to the EC marker CD31 (red), phospho-p65 (green), and DAPI staining for nuclei (blue) was performed (n=3). Typical microscopy examples (high power field) together with the corresponding quantitative assessment of nuclear phospho-p65 staining within CD31-positive glomerular EC using Image J is depicted. \*\*p<0.01, \*p<0.05.
